# Supplementary material
Source: publisher figshare collection journal article supplement (https://acs.figshare.com/ndownloader/files/5108521)
Supplement: Supplementary file 1 [file 5108521]

data_compound3a
_publ_contact_author_name             'Takayuki Kawashima'
_publ_section_title                   
;
Thermal and Photo-control of the Equilibrium between 
a Phosphinoazobenzene and an Inner Phosphonium Salt
;
_publ_contact_author_address
;
Department of Chemistry, Graduate School of Science,
The University of Tokyo,
7-3-1 Hongo, Bunkyo-ku, Tokyo, 113-0033, Japan
;
_publ_contact_author_email            'takayuki@chem..s.u-tokyo.ac.jp'
_publ_contact_author_fax              '+81-5800-6899'
_publ_contact_author_phone            '+81-5800-6899'
_publ_requested_journal       'Journal of the American Chemical Society'
_publ_requested_category     'FO'
loop_
_publ_author_name
_publ_author_footnote
_publ_author_address
'Masaki Yamamura'
;
;
;
Department of Chemistry, Graduate School of Science,
The University of Tokyo,
7-3-1 Hongo, Bunkyo-ku, Tokyo, 113-0033, Japan
;
'Naokazu Kano'
;
;
;
Department of Chemistry, Graduate School of Science,
The University of Tokyo,
7-3-1 Hongo, Bunkyo-ku, Tokyo, 113-0033, Japan
;
'Takayuki Kawashima'
;
;
;
Department of Chemistry, Graduate School of Science,
The University of Tokyo,
7-3-1 Hongo, Bunkyo-ku, Tokyo, 113-0033, Japan
;

_audit_creation_method            SHELXL-97 
_chemical_name_systematic 
; 
diphenyl[2-phenyl(azophenyl)]phosphine
; 
_chemical_name_common             'compound 3a'  
_chemical_melting_point           ? 
_chemical_formula_moiety           
 'C24 H19 N2 P' 
_chemical_formula_sum 
 'C24 H19 N2 P' 
_chemical_formula_weight          366.38 
 
loop_ 
 _atom_type_symbol 
 _atom_type_description 
 _atom_type_scat_dispersion_real 
 _atom_type_scat_dispersion_imag 
 _atom_type_scat_source 
 'C'  'C'   0.0033   0.0016 
 'International Tables Vol C Tables 4.2.6.8 and 6.1.1.4' 
 'H'  'H'   0.0000   0.0000 
 'International Tables Vol C Tables 4.2.6.8 and 6.1.1.4' 
 'N'  'N'   0.0061   0.0033 
 'International Tables Vol C Tables 4.2.6.8 and 6.1.1.4' 
 'P'  'P'   0.1023   0.0942 
 'International Tables Vol C Tables 4.2.6.8 and 6.1.1.4' 
 
_symmetry_cell_setting            'monoclinic'
_symmetry_space_group_name_H-M    'P 21/n' 
_symmetry_space_group_name_Hall  '-P 2yn' 
loop_ 
 _symmetry_equiv_pos_as_xyz 
 'x, y, z' 
 '-x+1/2, y+1/2, -z+1/2' 
 '-x, -y, -z' 
 'x-1/2, -y-1/2, z-1/2' 
 
_cell_length_a                    11.043(4) 
_cell_length_b                    10.218(4) 
_cell_length_c                    16.867(6) 
_cell_angle_alpha                 90.00 
_cell_angle_beta                  92.8030(13) 
_cell_angle_gamma                 90.00 
_cell_volume                      1901.1(12) 
_cell_formula_units_Z             4 
_cell_measurement_temperature     120(2) 
_cell_measurement_reflns_used     5036  
_cell_measurement_theta_min       3.01 
_cell_measurement_theta_max       27.48 
 
_exptl_crystal_description        'Block'
_exptl_crystal_colour             'red'
_exptl_crystal_size_max           0.50 
_exptl_crystal_size_mid           0.30 
_exptl_crystal_size_min           0.20 
_exptl_crystal_density_meas       ? 
_exptl_crystal_density_diffrn     1.280 
_exptl_crystal_density_method     'not measured' 
_exptl_crystal_F_000              768 
_exptl_absorpt_coefficient_mu     0.155 
_diffrn_measurement_device_type   ?
_exptl_absorpt_correction_type    'multi-scan' 
_exptl_absorpt_correction_T_min   0.9696 
_exptl_absorpt_correction_T_max   0.9696 
_exptl_absorpt_process_details    
'Jacobson, R. (1998), private communication'  
_exptl_special_details 
; 
 ? 
; 
 
_diffrn_ambient_temperature       120(2) 
_diffrn_radiation_wavelength      0.71070 
_diffrn_radiation_type            MoK\a 
_diffrn_radiation_source          'fine-focus sealed tube' 
_diffrn_measurement_type          ?
_diffrn_radiation_monochromator   graphite 
_diffrn_measurement_method        'dtintegrate.ref' 
_diffrn_detector_area_resol_mean  14.5666 
_diffrn_reflns_number             11353 
_diffrn_reflns_av_R_equivalents   0.0183 
_diffrn_reflns_av_sigmaI/netI     0.0455 
_diffrn_reflns_limit_h_min        -14 
_diffrn_reflns_limit_h_max        14 
_diffrn_reflns_limit_k_min        -13 
_diffrn_reflns_limit_k_max        12 
_diffrn_reflns_limit_l_min        -21 
_diffrn_reflns_limit_l_max        21 
_diffrn_reflns_theta_min          3.01 
_diffrn_reflns_theta_max          27.48 
_reflns_number_total              3425 
_reflns_number_gt                 3041 
_reflns_threshold_expression      >2sigma(I) 
_diffrn_reflns_reduction_process  'Lp corrections applied'
_diffrn_measurement_details
;
scan:
	Number of images: 600
	           Slice: -70.0000 - 110.0000
	     Image width: 0.3000
	        Exp time: 14.0000
	   Rotation axis: Omega
	           Omega: 0.0000
	             Chi: 45.0000
	             Phi: 0.0000
	             XTD: 45.1989
	          2theta: 19.7571
scan:
	Number of images: 600
	           Slice: -70.0000 - 110.0000
	     Image width: 0.3000
	        Exp time: 14.0000
	   Rotation axis: Omega
	           Omega: 0.0000
	             Chi: 45.0000
	             Phi: 90.0000
	             XTD: 45.1989
	          2theta: 19.7571

;
_diffrn_measurement_device_details
;
AFC8: Eulerian 3-circle
;
_diffrn_orient_matrix_UB_11             -0.0187
_diffrn_orient_matrix_UB_12             0.0107
_diffrn_orient_matrix_UB_13             -0.0881
_diffrn_orient_matrix_UB_21             -0.0957
_diffrn_orient_matrix_UB_22             0.0015
_diffrn_orient_matrix_UB_23             0.0205
_diffrn_orient_matrix_UB_31             0.0018
_diffrn_orient_matrix_UB_32             0.0592
_diffrn_orient_matrix_UB_33             0.0038
_diffrn_orient_matrix_type              'd*Trek'
_computing_data_collection        'CrystalClear (Rigaku Corp., 2000)' 
_computing_cell_refinement        'CrystalClear (Rigaku Corp., 2000)' 
_computing_data_reduction         'CrystalClear (Rigaku Corp., 2000)' 
_computing_structure_solution     'SHELXS-97 (Sheldrick, 1990)' 
_computing_structure_refinement   'SHELXL-97 (Sheldrick, 1997)' 
_computing_molecular_graphics     'ORTEP-3 (Farrugia, 1997)' 
_computing_publication_material   ? 
 
_refine_special_details 
; 
 Refinement of F^2^ against ALL reflections.  The weighted R-factor wR and 
 goodness of fit S are based on F^2^, conventional R-factors R are based 
 on F, with F set to zero for negative F^2^. The threshold expression of 
 F^2^ > 2sigma(F^2^) is used only for calculating R-factors(gt) etc. and is 
 not relevant to the choice of reflections for refinement.  R-factors based 
 on F^2^ are statistically about twice as large as those based on F, and R- 
 factors based on ALL data will be even larger. 
; 
 
_refine_ls_structure_factor_coef  Fsqd  
_refine_ls_matrix_type            full 
_refine_ls_weighting_scheme       calc  
_refine_ls_weighting_details 
 'calc w=1/[\s^2^(Fo^2^)+(0.0380P)^2^+0.3115P] where P=(Fo^2^+2Fc^2^)/3' 
_atom_sites_solution_primary      direct 
_atom_sites_solution_secondary    difmap 
_atom_sites_solution_hydrogens    geom 
_refine_ls_hydrogen_treatment     riding
_refine_ls_extinction_method      none 
_refine_ls_extinction_coef        ? 
_refine_ls_number_reflns          3425 
_refine_ls_number_parameters      244 
_refine_ls_number_restraints      0 
_refine_ls_R_factor_all           0.0418 
_refine_ls_R_factor_gt            0.0363 
_refine_ls_wR_factor_ref          0.0888 
_refine_ls_wR_factor_gt           0.0861 
_refine_ls_goodness_of_fit_ref    1.062 
_refine_ls_restrained_S_all       1.062 
_refine_ls_shift/su_max           0.000 
_refine_ls_shift/su_mean          0.000 
 
loop_ 
 _atom_site_label 
 _atom_site_type_symbol 
 _atom_site_fract_x 
 _atom_site_fract_y 
 _atom_site_fract_z 
 _atom_site_U_iso_or_equiv 
 _atom_site_adp_type 
 _atom_site_occupancy 
 _atom_site_symmetry_multiplicity 
 _atom_site_calc_flag 
 _atom_site_refinement_flags 
 _atom_site_disorder_assembly 
 _atom_site_disorder_group 
P1 P 0.03225(4) 0.76660(4) 0.12569(2) 0.02166(12) Uani 1 1 d . . . 
C1 C 0.01757(14) 0.79133(15) 0.01738(9) 0.0206(3) Uani 1 1 d . . . 
C2 C 0.15632(13) 0.64699(15) 0.13617(10) 0.0214(3) Uani 1 1 d . . . 
C3 C -0.10082(14) 0.66225(15) 0.14019(9) 0.0218(4) Uani 1 1 d . . . 
N1 N 0.20068(12) 0.91659(13) 0.03355(8) 0.0235(3) Uani 1 1 d . . . 
N2 N 0.26369(12) 1.00550(13) 0.00388(8) 0.0244(3) Uani 1 1 d . . . 
C4 C -0.07814(14) 0.74200(15) -0.03106(10) 0.0233(4) Uani 1 1 d . . . 
H1 H -0.1378 0.6885 -0.0084 0.028 Uiso 1 1 calc R . . 
C5 C -0.08753(15) 0.76990(16) -0.11173(10) 0.0262(4) Uani 1 1 d . . . 
H2 H -0.1531 0.7352 -0.1437 0.031 Uiso 1 1 calc R . . 
C6 C -0.00143(14) 0.84830(16) -0.14587(10) 0.0267(4) Uani 1 1 d . . . 
H3 H -0.0080 0.8668 -0.2011 0.032 Uiso 1 1 calc R . . 
C7 C 0.09400(14) 0.89949(15) -0.09940(9) 0.0236(4) Uani 1 1 d . . . 
H4 H 0.1531 0.9530 -0.1226 0.028 Uiso 1 1 calc R . . 
C8 C 0.10290(14) 0.87198(15) -0.01822(9) 0.0211(3) Uani 1 1 d . . . 
C9 C 0.36694(14) 1.04190(17) 0.05337(10) 0.0255(4) Uani 1 1 d . . . 
C10 C 0.41880(15) 0.96188(19) 0.11251(10) 0.0323(4) Uani 1 1 d . . . 
H5 H 0.3835 0.8796 0.1239 0.039 Uiso 1 1 calc R . . 
C11 C 0.52247(17) 1.0034(2) 0.15463(12) 0.0419(5) Uani 1 1 d . . . 
H6 H 0.5586 0.9494 0.1950 0.050 Uiso 1 1 calc R . . 
C12 C 0.57389(16) 1.1240(2) 0.13803(12) 0.0463(6) Uani 1 1 d . . . 
H7 H 0.6444 1.1523 0.1677 0.056 Uiso 1 1 calc R . . 
C13 C 0.52354(17) 1.2027(2) 0.07900(13) 0.0428(5) Uani 1 1 d . . . 
H8 H 0.5592 1.2849 0.0679 0.051 Uiso 1 1 calc R . . 
C14 C 0.42014(15) 1.16125(18) 0.03565(11) 0.0330(4) Uani 1 1 d . . . 
H9 H 0.3859 1.2143 -0.0059 0.040 Uiso 1 1 calc R . . 
C15 C 0.18936(14) 0.60684(16) 0.21364(10) 0.0254(4) Uani 1 1 d . . . 
H10 H 0.1497 0.6438 0.2570 0.030 Uiso 1 1 calc R . . 
C16 C 0.27908(15) 0.51394(16) 0.22775(11) 0.0283(4) Uani 1 1 d . . . 
H11 H 0.2984 0.4848 0.2804 0.034 Uiso 1 1 calc R . . 
C17 C 0.34071(15) 0.46347(16) 0.16488(11) 0.0296(4) Uani 1 1 d . . . 
H12 H 0.4027 0.4001 0.1745 0.036 Uiso 1 1 calc R . . 
C18 C 0.31208(15) 0.50516(17) 0.08822(11) 0.0304(4) Uani 1 1 d . . . 
H13 H 0.3559 0.4721 0.0454 0.036 Uiso 1 1 calc R . . 
C19 C 0.21917(15) 0.59545(16) 0.07366(10) 0.0269(4) Uani 1 1 d . . . 
H14 H 0.1985 0.6221 0.0208 0.032 Uiso 1 1 calc R . . 
C20 C -0.20948(15) 0.72482(17) 0.15651(10) 0.0303(4) Uani 1 1 d . . . 
H15 H -0.2121 0.8177 0.1586 0.036 Uiso 1 1 calc R . . 
C21 C -0.31348(16) 0.65339(19) 0.16963(11) 0.0367(5) Uani 1 1 d . . . 
H16 H -0.3871 0.6975 0.1791 0.044 Uiso 1 1 calc R . . 
C22 C -0.31012(16) 0.51770(18) 0.16891(11) 0.0335(4) Uani 1 1 d . . . 
H17 H -0.3805 0.4686 0.1795 0.040 Uiso 1 1 calc R . . 
C23 C -0.20357(15) 0.45463(18) 0.15263(10) 0.0299(4) Uani 1 1 d . . . 
H18 H -0.2012 0.3617 0.1515 0.036 Uiso 1 1 calc R . . 
C24 C -0.10014(15) 0.52552(16) 0.13801(10) 0.0249(4) Uani 1 1 d . . . 
H19 H -0.0278 0.4806 0.1263 0.030 Uiso 1 1 calc R . . 
 
loop_ 
 _atom_site_aniso_label 
 _atom_site_aniso_U_11 
 _atom_site_aniso_U_22 
 _atom_site_aniso_U_33 
 _atom_site_aniso_U_23 
 _atom_site_aniso_U_13 
 _atom_site_aniso_U_12 
P1 0.0212(2) 0.0215(2) 0.0223(2) -0.00073(18) 0.00144(16) -0.00043(18) 
C1 0.0200(8) 0.0171(8) 0.0248(8) -0.0006(7) 0.0018(6) 0.0040(6) 
C2 0.0175(8) 0.0194(8) 0.0273(9) -0.0011(7) 0.0003(7) -0.0038(6) 
C3 0.0225(8) 0.0234(9) 0.0195(8) 0.0021(7) 0.0010(6) -0.0007(7) 
N1 0.0221(7) 0.0217(7) 0.0269(8) -0.0021(6) 0.0028(6) -0.0010(6) 
N2 0.0217(7) 0.0236(7) 0.0281(8) -0.0035(6) 0.0045(6) -0.0019(6) 
C4 0.0197(8) 0.0225(9) 0.0278(9) 0.0000(7) 0.0022(6) -0.0002(7) 
C5 0.0215(8) 0.0286(9) 0.0281(9) -0.0033(8) -0.0042(7) 0.0029(7) 
C6 0.0258(9) 0.0295(10) 0.0246(9) 0.0018(7) 0.0006(7) 0.0066(7) 
C7 0.0232(8) 0.0213(9) 0.0266(9) 0.0022(7) 0.0035(7) 0.0015(7) 
C8 0.0197(8) 0.0185(8) 0.0252(8) -0.0008(7) 0.0009(6) 0.0032(7) 
C9 0.0192(8) 0.0312(10) 0.0266(9) -0.0103(8) 0.0049(7) -0.0010(7) 
C10 0.0278(9) 0.0417(11) 0.0276(10) -0.0086(8) 0.0024(8) 0.0007(8) 
C11 0.0304(10) 0.0648(14) 0.0301(10) -0.0151(10) -0.0024(8) 0.0080(10) 
C12 0.0212(9) 0.0717(16) 0.0460(12) -0.0367(12) 0.0031(8) -0.0050(10) 
C13 0.0287(10) 0.0475(12) 0.0533(13) -0.0246(11) 0.0128(9) -0.0112(9) 
C14 0.0269(9) 0.0316(10) 0.0412(11) -0.0106(8) 0.0088(8) -0.0039(8) 
C15 0.0232(8) 0.0271(9) 0.0256(9) -0.0002(7) -0.0009(7) -0.0042(7) 
C16 0.0221(8) 0.0304(10) 0.0316(10) 0.0041(8) -0.0069(7) -0.0042(7) 
C17 0.0177(8) 0.0248(9) 0.0460(11) 0.0031(8) -0.0030(8) 0.0003(7) 
C18 0.0251(9) 0.0281(9) 0.0384(11) -0.0036(8) 0.0056(8) 0.0025(7) 
C19 0.0266(9) 0.0277(9) 0.0264(9) 0.0005(7) 0.0009(7) -0.0003(7) 
C20 0.0279(9) 0.0266(9) 0.0369(10) 0.0036(8) 0.0077(8) 0.0034(8) 
C21 0.0235(9) 0.0398(11) 0.0475(12) 0.0064(9) 0.0109(8) 0.0041(8) 
C22 0.0253(9) 0.0382(11) 0.0371(11) 0.0025(8) 0.0030(8) -0.0094(8) 
C23 0.0307(9) 0.0257(9) 0.0331(10) -0.0012(8) -0.0009(8) -0.0056(8) 
C24 0.0224(8) 0.0257(9) 0.0265(9) -0.0020(7) 0.0002(7) 0.0010(7) 
 
_geom_special_details 
; 
 All esds (except the esd in the dihedral angle between two l.s. planes) 
 are estimated using the full covariance matrix.  The cell esds are taken 
 into account individually in the estimation of esds in distances, angles 
 and torsion angles; correlations between esds in cell parameters are only 
 used when they are defined by crystal symmetry.  An approximate (isotropic) 
 treatment of cell esds is used for estimating esds involving l.s. planes. 
; 
 
loop_ 
 _geom_bond_atom_site_label_1 
 _geom_bond_atom_site_label_2 
 _geom_bond_distance 
 _geom_bond_site_symmetry_2 
 _geom_bond_publ_flag 
P1 C2 1.8381(17) . ? 
P1 C3 1.8416(17) . ? 
P1 C1 1.8436(17) . ? 
C1 C4 1.398(2) . ? 
C1 C8 1.408(2) . ? 
C2 C19 1.394(2) . ? 
C2 C15 1.401(2) . ? 
C3 C24 1.398(2) . ? 
C3 C20 1.399(2) . ? 
N1 N2 1.2625(18) . ? 
N1 C8 1.430(2) . ? 
N2 C9 1.429(2) . ? 
C4 C5 1.389(2) . ? 
C4 H1 0.9500 . ? 
C5 C6 1.390(2) . ? 
C5 H2 0.9500 . ? 
C6 C7 1.385(2) . ? 
C6 H3 0.9500 . ? 
C7 C8 1.397(2) . ? 
C7 H4 0.9500 . ? 
C9 C10 1.391(2) . ? 
C9 C14 1.392(2) . ? 
C10 C11 1.384(2) . ? 
C10 H5 0.9500 . ? 
C11 C12 1.391(3) . ? 
C11 H6 0.9500 . ? 
C12 C13 1.376(3) . ? 
C12 H7 0.9500 . ? 
C13 C14 1.392(3) . ? 
C13 H8 0.9500 . ? 
C14 H9 0.9500 . ? 
C15 C16 1.384(2) . ? 
C15 H10 0.9500 . ? 
C16 C17 1.387(2) . ? 
C16 H11 0.9500 . ? 
C17 C18 1.383(2) . ? 
C17 H12 0.9500 . ? 
C18 C19 1.393(2) . ? 
C18 H13 0.9500 . ? 
C19 H14 0.9500 . ? 
C20 C21 1.388(2) . ? 
C20 H15 0.9500 . ? 
C21 C22 1.387(3) . ? 
C21 H16 0.9500 . ? 
C22 C23 1.381(2) . ? 
C22 H17 0.9500 . ? 
C23 C24 1.385(2) . ? 
C23 H18 0.9500 . ? 
C24 H19 0.9500 . ? 
 
loop_ 
 _geom_angle_atom_site_label_1 
 _geom_angle_atom_site_label_2 
 _geom_angle_atom_site_label_3 
 _geom_angle 
 _geom_angle_site_symmetry_1 
 _geom_angle_site_symmetry_3 
 _geom_angle_publ_flag 
C2 P1 C3 101.43(8) . . ? 
C2 P1 C1 102.44(7) . . ? 
C3 P1 C1 100.30(7) . . ? 
C4 C1 C8 117.67(15) . . ? 
C4 C1 P1 123.85(12) . . ? 
C8 C1 P1 118.33(12) . . ? 
C19 C2 C15 118.58(15) . . ? 
C19 C2 P1 125.10(13) . . ? 
C15 C2 P1 116.32(12) . . ? 
C24 C3 C20 117.89(15) . . ? 
C24 C3 P1 124.75(12) . . ? 
C20 C3 P1 117.34(12) . . ? 
N2 N1 C8 113.69(14) . . ? 
N1 N2 C9 113.28(14) . . ? 
C5 C4 C1 121.11(15) . . ? 
C5 C4 H1 119.4 . . ? 
C1 C4 H1 119.4 . . ? 
C4 C5 C6 120.29(15) . . ? 
C4 C5 H2 119.9 . . ? 
C6 C5 H2 119.9 . . ? 
C7 C6 C5 120.03(16) . . ? 
C7 C6 H3 120.0 . . ? 
C5 C6 H3 120.0 . . ? 
C6 C7 C8 119.61(15) . . ? 
C6 C7 H4 120.2 . . ? 
C8 C7 H4 120.2 . . ? 
C7 C8 C1 121.29(14) . . ? 
C7 C8 N1 123.33(14) . . ? 
C1 C8 N1 115.30(14) . . ? 
C10 C9 C14 120.36(16) . . ? 
C10 C9 N2 123.68(15) . . ? 
C14 C9 N2 115.82(16) . . ? 
C11 C10 C9 119.27(19) . . ? 
C11 C10 H5 120.4 . . ? 
C9 C10 H5 120.4 . . ? 
C10 C11 C12 120.3(2) . . ? 
C10 C11 H6 119.9 . . ? 
C12 C11 H6 119.9 . . ? 
C13 C12 C11 120.59(18) . . ? 
C13 C12 H7 119.7 . . ? 
C11 C12 H7 119.7 . . ? 
C12 C13 C14 119.65(19) . . ? 
C12 C13 H8 120.2 . . ? 
C14 C13 H8 120.2 . . ? 
C13 C14 C9 119.85(19) . . ? 
C13 C14 H9 120.1 . . ? 
C9 C14 H9 120.1 . . ? 
C16 C15 C2 120.86(16) . . ? 
C16 C15 H10 119.6 . . ? 
C2 C15 H10 119.6 . . ? 
C15 C16 C17 119.81(16) . . ? 
C15 C16 H11 120.1 . . ? 
C17 C16 H11 120.1 . . ? 
C18 C17 C16 120.13(16) . . ? 
C18 C17 H12 119.9 . . ? 
C16 C17 H12 119.9 . . ? 
C17 C18 C19 120.11(16) . . ? 
C17 C18 H13 119.9 . . ? 
C19 C18 H13 119.9 . . ? 
C18 C19 C2 120.45(16) . . ? 
C18 C19 H14 119.8 . . ? 
C2 C19 H14 119.8 . . ? 
C21 C20 C3 121.04(16) . . ? 
C21 C20 H15 119.5 . . ? 
C3 C20 H15 119.5 . . ? 
C22 C21 C20 120.11(16) . . ? 
C22 C21 H16 119.9 . . ? 
C20 C21 H16 119.9 . . ? 
C23 C22 C21 119.45(16) . . ? 
C23 C22 H17 120.3 . . ? 
C21 C22 H17 120.3 . . ? 
C22 C23 C24 120.64(16) . . ? 
C22 C23 H18 119.7 . . ? 
C24 C23 H18 119.7 . . ? 
C23 C24 C3 120.84(16) . . ? 
C23 C24 H19 119.6 . . ? 
C3 C24 H19 119.6 . . ? 
 
loop_ 
 _geom_torsion_atom_site_label_1 
 _geom_torsion_atom_site_label_2 
 _geom_torsion_atom_site_label_3 
 _geom_torsion_atom_site_label_4 
 _geom_torsion 
 _geom_torsion_site_symmetry_1 
 _geom_torsion_site_symmetry_2 
 _geom_torsion_site_symmetry_3 
 _geom_torsion_site_symmetry_4 
 _geom_torsion_publ_flag 
C2 P1 C1 C4 106.86(14) . . . . ? 
C3 P1 C1 C4 2.60(15) . . . . ? 
C2 P1 C1 C8 -77.69(13) . . . . ? 
C3 P1 C1 C8 178.05(12) . . . . ? 
C3 P1 C2 C19 104.28(14) . . . . ? 
C1 P1 C2 C19 0.90(15) . . . . ? 
C3 P1 C2 C15 -76.30(13) . . . . ? 
C1 P1 C2 C15 -179.68(12) . . . . ? 
C2 P1 C3 C24 -14.42(15) . . . . ? 
C1 P1 C3 C24 90.66(15) . . . . ? 
C2 P1 C3 C20 163.90(13) . . . . ? 
C1 P1 C3 C20 -91.02(14) . . . . ? 
C8 N1 N2 C9 -175.16(12) . . . . ? 
C8 C1 C4 C5 1.0(2) . . . . ? 
P1 C1 C4 C5 176.51(12) . . . . ? 
C1 C4 C5 C6 -0.2(2) . . . . ? 
C4 C5 C6 C7 -0.3(2) . . . . ? 
C5 C6 C7 C8 -0.1(2) . . . . ? 
C6 C7 C8 C1 1.0(2) . . . . ? 
C6 C7 C8 N1 177.57(14) . . . . ? 
C4 C1 C8 C7 -1.4(2) . . . . ? 
P1 C1 C8 C7 -177.16(12) . . . . ? 
C4 C1 C8 N1 -178.28(13) . . . . ? 
P1 C1 C8 N1 5.99(18) . . . . ? 
N2 N1 C8 C7 14.6(2) . . . . ? 
N2 N1 C8 C1 -168.64(13) . . . . ? 
N1 N2 C9 C10 21.6(2) . . . . ? 
N1 N2 C9 C14 -162.74(14) . . . . ? 
C14 C9 C10 C11 1.3(2) . . . . ? 
N2 C9 C10 C11 176.78(15) . . . . ? 
C9 C10 C11 C12 0.1(3) . . . . ? 
C10 C11 C12 C13 -0.9(3) . . . . ? 
C11 C12 C13 C14 0.1(3) . . . . ? 
C12 C13 C14 C9 1.3(3) . . . . ? 
C10 C9 C14 C13 -2.1(2) . . . . ? 
N2 C9 C14 C13 -177.88(15) . . . . ? 
C19 C2 C15 C16 -2.6(2) . . . . ? 
P1 C2 C15 C16 177.91(12) . . . . ? 
C2 C15 C16 C17 2.6(2) . . . . ? 
C15 C16 C17 C18 -0.4(2) . . . . ? 
C16 C17 C18 C19 -1.7(3) . . . . ? 
C17 C18 C19 C2 1.6(2) . . . . ? 
C15 C2 C19 C18 0.5(2) . . . . ? 
P1 C2 C19 C18 179.94(12) . . . . ? 
C24 C3 C20 C21 -0.4(3) . . . . ? 
P1 C3 C20 C21 -178.83(14) . . . . ? 
C3 C20 C21 C22 1.8(3) . . . . ? 
C20 C21 C22 C23 -2.0(3) . . . . ? 
C21 C22 C23 C24 0.8(3) . . . . ? 
C22 C23 C24 C3 0.7(3) . . . . ? 
C20 C3 C24 C23 -0.8(2) . . . . ? 
P1 C3 C24 C23 177.47(13) . . . . ? 
 
_diffrn_measured_fraction_theta_max    0.784 
_diffrn_reflns_theta_full              27.48 
_diffrn_measured_fraction_theta_full   0.784 
_refine_diff_density_max    0.293 
_refine_diff_density_min   -0.253 
_refine_diff_density_rms    0.045 
